# Supplementary figures and images for: Periprocedural Changes of NT‐proBNP Are Associated With Survival After Transcatheter Aortic Valve Implantation
Source: PubMed Central journal article supplement — J Am Heart Assoc. 2019 Jan 26;8(3):e010876. doi: 10.1161/JAHA.118.010876 (PMC6405592; doi:10.1161/jaha.118.010876), 2019-01-26

# **SUPPLEMENTAL MATERIAL**

Figure S1. Distribution of the NT-proBNP ratio.

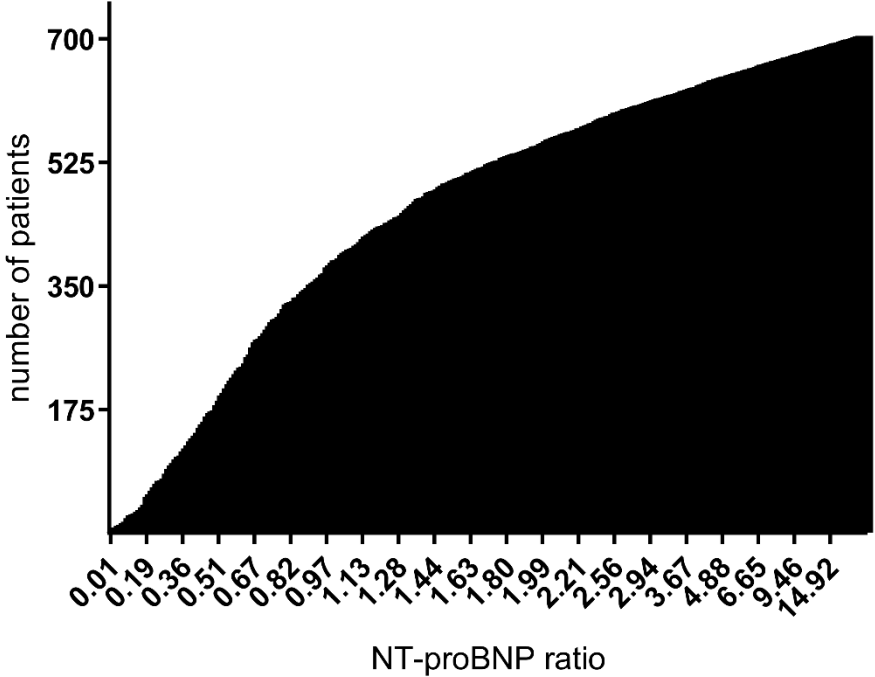

Supplement: JAH3-8-e010876-s001.pdf [file JAH3-8-e010876-s001.pdf]
